# Supplementary material for: Multistability maintains redox homeostasis in human cells
Source: PubMed Central journal article supplement (PMC8493564; doi:10.15252/msb.202110480), 2021-10-06
Supplement: MSB-17-e10480-s002.pdf [file MSB-17-e10480-s002.pdf]

## APPENDIX for “Multistability maintains redox homeostasis in human cells”

Jo-Hsi Huang<sup>1,a</sup>, Hannah K. C. Co<sup>2,a</sup>, Yi-Chen Lee<sup>2</sup>, Chia-Chou Wu<sup>2</sup>, Sheng-hong Chen<sup>2,b</sup>

1. *Department of Chemical and Systems Biology, Stanford University School of Medicine, Stanford, CA 94305, USA*

2. *Institute of Molecular Biology, Academia Sinica, Taipei, Taiwan 115*

a. These authors contributed equally

b. Corresponding author: [shengchen@gate.sinica.edu.tw](mailto:shengchen@gate.sinica.edu.tw)

### TABLE OF CONTENTS

#### **Appendix Supplementary Figures**

Figure S1 --- page 2

Figure S2 --- page 3

#### **Appendix Supplementary Tables**

Table S1 --- page 4

Table S2 --- page 5

Table S3 --- page 6

Table S4 --- page 7

Table S5 --- page 8

Table S6 --- page 9

Table S7 --- page 10

Table S8 --- page 11

Table S9 --- page 12

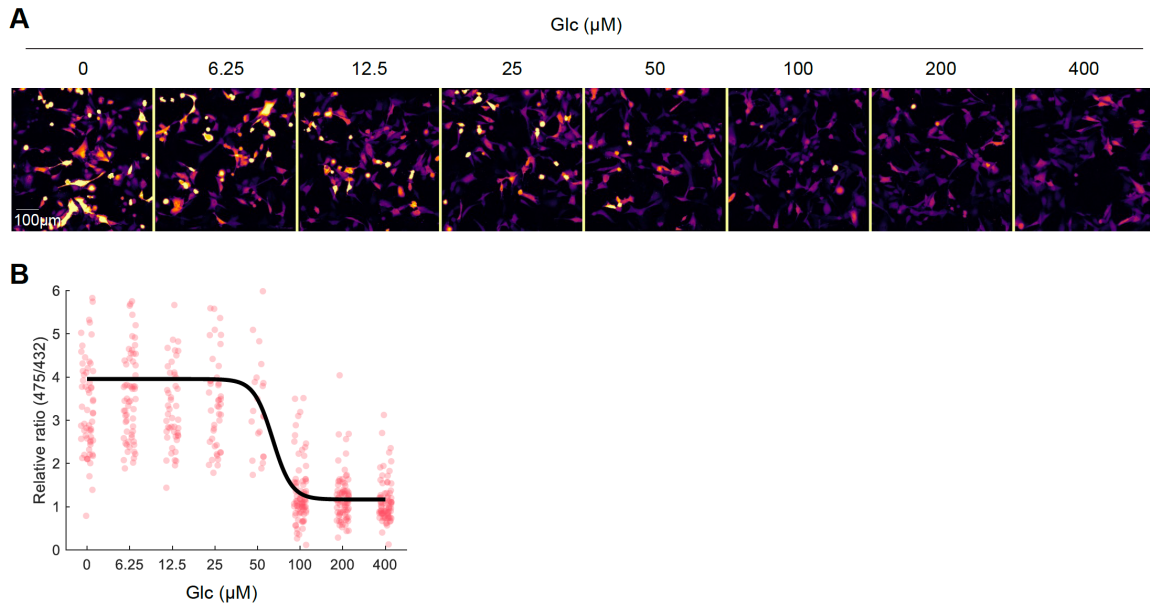

**Appendix Figure S1. Ultrasensitivity of the ROS-response curve in U87-MG cells**

(A) Representative HyPer7 images of U87-MG-HyPer7 cells 10 h after glucose deprivation (from 400  $\mu\text{M}$  to 0  $\mu\text{M}$ ). (B) A dose-response curve of ROS 10 h after glucose deprivation. For each glucose concentration, the ROS levels of 80 cells were quantified. To deconvolute the effects of non-responsive cells, they were not considered in the analyses of the lower five glucose concentrations (0  $\mu\text{M}$ , 6.3  $\mu\text{M}$ , 12.5  $\mu\text{M}$ , 25  $\mu\text{M}$  and 50  $\mu\text{M}$ ). A Hill exponent ( $n$ ) was fitted to be 6.5, with a 95% confidence interval of 2-11.

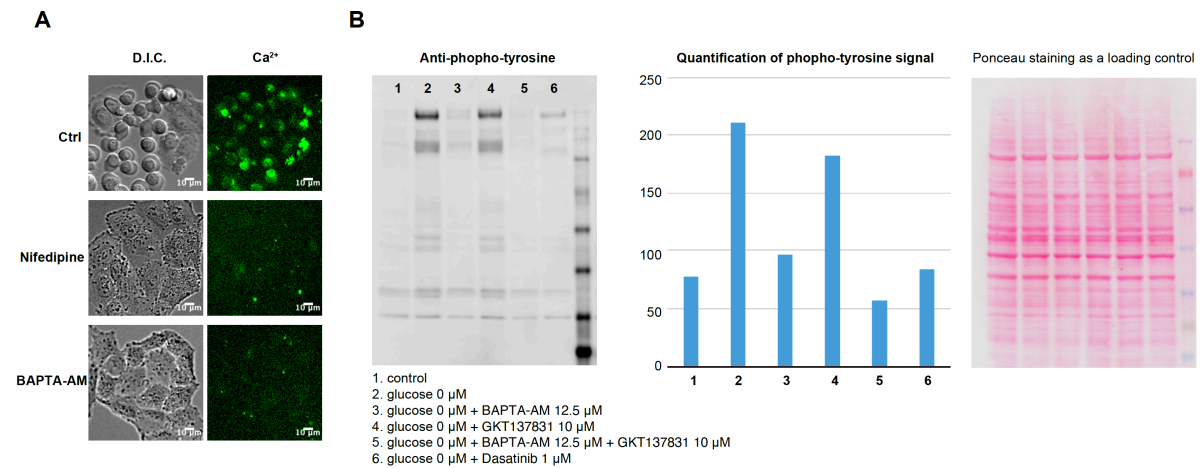

### Appendix Figure S2. Validation of calcium and NOX inhibitors.

(A) Representative differential interference contrast (D.I.C., left panel) and fluorescent images of calcium indicator Fluo-4 AM (right panel) of LN18 cells 3 h after glucose deprivation. Cells were pre-treated with Nifedipine (10  $\mu$ M) and BAPTA-AM (12.5  $\mu$ M) 1 h before glucose deprivation to inhibit calcium signaling. (B) Activity of tyrosine kinase signaling was probed with western blot analysis using an anti-phospho-tyrosine antibody (4G10, Cell Signaling Technology) under normal [glucose] (band 1), no glucose (band 2), and no glucose with addition of BAPTA-AM alone (band 3), GKT137831 alone (band 4) and both (band 5). A multi-targeted tyrosine kinase inhibitor, Dasatinib (1  $\mu$ M, band 6), was used as a positive control for suppression of tyrosine kinase signaling. The middle and right panels show the quantifications of phospho-tyrosine and the protein loading control respectively.

Appendix Table S1 - Variable Concentration Ranges

| Molecule    | Location  | Organism | Concentration          | Unit | Ref                                                                                                                                                                                                                                    | Assumption made to convert unit       | Converted quantity | Converted unit | Note                      |
|-------------|-----------|----------|------------------------|------|----------------------------------------------------------------------------------------------------------------------------------------------------------------------------------------------------------------------------------------|---------------------------------------|--------------------|----------------|---------------------------|
| SLC7A11     | Cell      | Human    | 200 ppm                |      | PaxDB ( <a href="https://pax-db.org/protein/1846679">https://pax-db.org/protein/1846679</a> ); See table 002                                                                                                                           | 10000 ppm ~ 500 uM (See Table EV2)    | 10 uM              |                | Upper bound               |
| GSH         | Cell      | Human    | 10 mM                  |      | Bionumbers #113865;<br>Forman et al. Mol. Aspects Med. 2009                                                                                                                                                                            | NA                                    | 10000 uM           |                | Upper bound               |
| GSH         | Cell      | Human    | 1 mM                   |      | Bionumbers #113865;<br>Forman et al. Mol. Aspects Med. 2009                                                                                                                                                                            | NA                                    | 1000 uM            |                | Lower bound               |
| GSH/GSSG    | Cell      | Human    | 100 NA                 |      | Zilka et al. Oncol. Lett. 2012                                                                                                                                                                                                         | NA                                    | 100 NA             |                | Upper bound               |
| GSH/GSSG    | Cell      | Human    | 10 NA                  |      | Zilka et al. Oncol. Lett. 2012                                                                                                                                                                                                         | NA                                    | 10 NA              |                | Lower bound               |
| GSSG        | Cell      | Human    | 1 mM                   |      | Calculated from above                                                                                                                                                                                                                  | NA                                    | 1000 uM            |                | Upper bound               |
| GSSG        | Cell      | Human    | 0.01 mM                |      | Calculated from above                                                                                                                                                                                                                  | NA                                    | 10 uM              |                | Lower bound               |
| Glu         | Cell      | Human    | 20 mM                  |      | Bionumbers #100790                                                                                                                                                                                                                     | NA                                    | 20000 uM           |                | NA                        |
| Glu         | Cell      | Human    | 10 mM                  |      | Featherstone. ACS Chem. Neurosci. 2010                                                                                                                                                                                                 | NA                                    | 10000 uM           |                | Upper bound               |
| Glu         | Cell      | Human    | 5 mM                   |      | Featherstone. ACS Chem. Neurosci. 2010                                                                                                                                                                                                 | NA                                    | 5000 uM            |                | Lower bound               |
| Cys2        | Cell      | Human    | 2 nmol / mg protein    |      | Jamalpoor et al. Biomed. Chromatogr. 2017, Fig. 3                                                                                                                                                                                      | Cellular protein concentration 300 mg | 600 uM             |                | Cystinotic cell           |
| Cys2        | Cell      | Human    | 0.05 nmol / mg protein |      | Jamalpoor et al. Biomed. Chromatogr. 2017, Fig. 3                                                                                                                                                                                      | Cellular protein concentration 300 mg | 15 uM              |                | Healthy cell              |
| Cys         | Cell      | Human    | 1.5 nmol / mg protein  |      | Sato et al. J. Biol. Chem. 2005, Fig. 7                                                                                                                                                                                                | Cellular protein concentration 300 mg | 450 uM             |                | NA                        |
| Cys         | Cell      | Human    | 4 nmol / mg protein    |      | Stipanuk et al. J. Nutr. 2006, Fig. 4                                                                                                                                                                                                  | Cellular protein concentration 300 mg | 1200 uM            |                | Lower bound               |
| Cys         | Cell      | Human    | 6 nmol / mg protein    |      | Stipanuk et al. J. Nutr. 2006, Fig. 4                                                                                                                                                                                                  | Cellular protein concentration 300 mg | 1800 uM            |                | Upper bound               |
| NADPH       | Cell      | Human    | 3 uM                   |      | Zou et al. Nat. Protoc. 2018, Table 2                                                                                                                                                                                                  | NA                                    | 3 uM               |                | NA                        |
| NADPH/NADP+ | Cell      | Human    | 300 NA                 |      | Zou et al. Nat. Protoc. 2018, Table 2                                                                                                                                                                                                  | NA                                    | 300 NA             |                | Upper bound               |
| NADPH/NADP+ | Cell      | Human    | 15 NA                  |      | Zou et al. Nat. Protoc. 2018, Table 2                                                                                                                                                                                                  | NA                                    | 15 NA              |                | Lower bound               |
| NADP+       | Cell      | Human    | 200 nM                 |      | Zou et al. Nat. Protoc. 2018, Table 2                                                                                                                                                                                                  | NA                                    | 0.2 uM             |                | Upper bound               |
| NADP+       | Cell      | Human    | 10 nM                  |      | Zou et al. Nat. Protoc. 2018, Table 2                                                                                                                                                                                                  | NA                                    | 0.01 uM            |                | Lower bound               |
| ROS         | Cell      | Human    | 0.01 uM                |      | Giorgio et al. Nat. Rev. Mol. Cell Biol. 2007, Box 1                                                                                                                                                                                   | NA                                    | 0.01 uM            |                | Proliferative             |
| ROS         | Cell      | Human    | 0.1 uM                 |      | Giorgio et al. Nat. Rev. Mol. Cell Biol. 2007, Box 1                                                                                                                                                                                   | NA                                    | 0.1 uM             |                | Proliferative             |
| ROS         | Cell      | Human    | 1 uM                   |      | Giorgio et al. Nat. Rev. Mol. Cell Biol. 2007, Box 1                                                                                                                                                                                   | NA                                    | 1 uM               |                | Growth arrest             |
| ROS         | Cell      | Human    | 100 uM                 |      | Antunes and Cadenas. Free Radic. Biol. Med. 2001, Fig. 2                                                                                                                                                                               | NA                                    | 100 uM             |                | Cell death                |
| ROS         | Cell      | Human    | 1 uM                   |      | Huang et al. ACS Synth. Biol. 2016, Fig. 4 and 5                                                                                                                                                                                       | NA                                    | 1 uM               |                | Cell death                |
| ROS         | Cell      | Human    | 50 nM                  |      | Sies. Redox Biol. 2017;                                                                                                                                                                                                                | NA                                    | 0.5 uM             |                | Cell death                |
| ROS         | Cell      | Human    | 0.01 uM                |      | Sies and Jones. Nat. Rev. Mol. Cell Biol. 2020                                                                                                                                                                                         | NA                                    | 0.01 uM            |                | Proliferative             |
| ROS         | Cell      | Human    | 0.1 uM                 |      | Sies. Redox Biol. 2017;                                                                                                                                                                                                                | NA                                    | 0.1 uM             |                | Stress;                   |
| ROS         | Cell      | Human    | 0.1 uM                 |      | Sies and Jones. Nat. Rev. Mol. Cell Biol. 2020                                                                                                                                                                                         | NA                                    | 0.1 uM             |                | Stress;                   |
| ROS         | Cell      | Human    | 1 uM                   |      | Sies. Redox Biol. 2017;                                                                                                                                                                                                                | NA                                    | 1 uM               |                | Growth arrest; Cell death |
| ROS         | Cell      | Human    | 1 uM                   |      | Sies and Jones. Nat. Rev. Mol. Cell Biol. 2020                                                                                                                                                                                         | NA                                    | 1 uM               |                | Growth arrest; Cell death |
| RTK         | Cell      | Human    | 100 nM                 |      | Take generic number from Cell Biology by the Numbers ( <a href="http://book.bionumbers.org/what-are-the-absolute-numbers-of-signaling-proteins/">http://book.bionumbers.org/what-are-the-absolute-numbers-of-signaling-proteins/</a> ) | NA                                    | 0.1 uM             |                | NA                        |
| PPTase      | Cell      | Human    | 100 nM                 |      | Take generic number from Cell Biology by the Numbers ( <a href="http://book.bionumbers.org/what-are-the-absolute-numbers-of-signaling-proteins/">http://book.bionumbers.org/what-are-the-absolute-numbers-of-signaling-proteins/</a> ) | NA                                    | 0.1 uM             |                | NA                        |
| Ca2+        | Cell      | Human    | 100 nM                 |      | Bionumbers #107490;                                                                                                                                                                                                                    | NA                                    | 0.1 uM             |                | NA                        |
| Glc         | RPMI-1640 | NA       | 11.11 mM               |      | Clapham. Cell 2007                                                                                                                                                                                                                     | NA                                    | 0.1 uM             |                | NA                        |
| Gln         | RPMI-1640 | NA       | 2 mM                   |      | General RPMI-1640 recipe                                                                                                                                                                                                               | NA                                    | 11110 uM           |                | NA                        |
| Cys2        | RPMI-1640 | NA       | 0.2 mM                 |      | General RPMI-1640 recipe                                                                                                                                                                                                               | NA                                    | 2000 uM            |                | NA                        |
| Cys2        | RPMI-1640 | NA       | 0.2 mM                 |      | General RPMI-1640 recipe                                                                                                                                                                                                               | NA                                    | 200 uM             |                | NA                        |

**Appendix Table S2 - Estimation of SLCTA11 using Actin**  
**Molecule**      **Location Organism**      **Concentration Unit**      **Ref**      **Assumption made to convert unit**      **Converted quantity**      **Converted unit**      **Note**

|                   |      |                       |                  |                                                                                                                                                                    |           |          |                                                               |
|-------------------|------|-----------------------|------------------|--------------------------------------------------------------------------------------------------------------------------------------------------------------------|-----------|----------|---------------------------------------------------------------|
| Total actin       | Cell | Mammals               | 500 uM           | Lodish et al. Freeman. 2000, Molecular Cell Biology, 4th Edition, Section 18.1                                                                                     | NA        | 500 uM   | NA                                                            |
| Total actin       | Cell | Acanthamoeba          | 200 uM           | Pollard et al. Annu. Rev. Biophys. Biomol. Struct. 2000, Table 1                                                                                                   | NA        | 200 uM   | NA                                                            |
| Total actin       | Cell | Dictyostellium        | 250 uM           | Pollard et al. Annu. Rev. Biophys. Biomol. Struct. 2000, Table 1                                                                                                   | NA        | 250 uM   | NA                                                            |
| Total actin       | Cell | Mammals (Neutrophils) | 400 uM           | Pollard et al. Annu. Rev. Biophys. Biomol. Struct. 2000, Table 1                                                                                                   | NA        | 400 uM   | NA                                                            |
| Total actin       | Cell | Mammals (Platelets)   | 550 uM           | Pollard et al. Annu. Rev. Biophys. Biomol. Struct. 2000, Table 1                                                                                                   | NA        | 550 uM   | NA                                                            |
| Polymerized actin | Cell | Eukaryotes            | 1000 uM          | Bionumbers #109980                                                                                                                                                 | NA        | 1000 uM  | NA                                                            |
| Total actin       | Cell | Unspecified           | 100 uM           | Bionumbers #109293                                                                                                                                                 | NA        | 100 uM   | NA                                                            |
| Total G-actin     | Cell | Unspecified           | 100 uM           | Bionumbers #112131                                                                                                                                                 | NA        | 100 uM   | NA                                                            |
| Total actin       | Cell | Dictyostellium        | 250 uM           | Bionumbers #109565                                                                                                                                                 | NA        | 250 uM   | NA                                                            |
| ACTA1             | Cell | Human                 | 150 ppm          | PaxDB ( <a href="https://pax-db.org/protein/1854428">https://pax-db.org/protein/1854428</a> )                                                                      |           |          | normalized average                                            |
| ACTB              | Cell | Human                 | 5000 ppm         | PaxDB ( <a href="https://pax-db.org/protein/1853523">https://pax-db.org/protein/1853523</a> )                                                                      |           |          | normalized average                                            |
| ACTC1             | Cell | Human                 | 800 ppm          | PaxDB ( <a href="https://pax-db.org/protein/1847228">https://pax-db.org/protein/1847228</a> )                                                                      |           |          | normalized average                                            |
| ACTG1             | Cell | Human                 | 5000 ppm         | PaxDB ( <a href="https://pax-db.org/protein/1851354">https://pax-db.org/protein/1851354</a> )                                                                      |           |          | normalized average                                            |
| Total Actin       | Cell | Human                 | 10000 ppm        | Summation over PaxDB entries                                                                                                                                       | 10000 ppm | ~ 500 uM | normalized average                                            |
| SLCTA11           | Cell | Human                 | 1.5 ppm          | PaxDB ( <a href="https://pax-db.org/protein/1846679">https://pax-db.org/protein/1846679</a> )                                                                      | 10000 ppm | ~ 500 uM | normalized average                                            |
| SLCTA11           | Cell | Human                 | 200 ppm          | PaxDB ( <a href="https://pax-db.org/protein/1846679">https://pax-db.org/protein/1846679</a> )                                                                      | 10000 ppm | ~ 500 uM | Upper bound                                                   |
| Total protein     | Cell | Human                 | $10 \times 10^9$ | Cell biology by the numbers; <a href="http://book.bionumbers.org/how-many-proteins-are-in-a-cell/">http://book.bionumbers.org/how-many-proteins-are-in-a-cell/</a> |           |          | Cell volume ~ 3 pL;<br>Avogadro's number ~ $6 \times 10^{23}$ |
|                   |      |                       | molecules        |                                                                                                                                                                    |           |          | 50 mM                                                         |

**Appendix Table S3 - Nutrient Uptake Km**

| <b>Nutrient</b> | <b>Transporter</b> | <b>Measure</b> | <b>Value</b> | <b>Unit</b> | <b>Ref</b>                                                                     | <b>Assumption made to convert unit</b> | <b>Converted quantity</b> | <b>Converted unit</b> | <b>Note</b>                     |
|-----------------|--------------------|----------------|--------------|-------------|--------------------------------------------------------------------------------|----------------------------------------|---------------------------|-----------------------|---------------------------------|
| Glc             | SLC2A1             | Km             | 1.5 mM       |             | Lodish et al. Freeman. 2000. Molecular Cell Biology. 4th Edition, Section 15.3 | NA                                     | 1500 $\mu$ M              | NA                    | NA                              |
| Gln             | SLC1A5             | Km             | 0.1 mM       |             | Pingitore et al. Biochim. Biophys. Acta 2013, Fig. 9A                          | NA                                     | 100 $\mu$ M               | NA                    | NA                              |
| Gln             | SLC1A5             | Km             | 30 $\mu$ M   |             | Fuchs and Bode. Semin. Cancer Biol. 2005                                       | NA                                     | 30 $\mu$ M                | NA                    | Lower estimate                  |
| Gln             | SLC1A5             | Km             | 90 $\mu$ M   |             | Fuchs and Bode. Semin. Cancer Biol. 2005                                       | NA                                     | 90 $\mu$ M                | NA                    | Higher estimate                 |
| Gln             | SLC7A5             | Km             | 1.6 mM       |             | Fuchs and Bode. Semin. Cancer Biol. 2005                                       | NA                                     | 1600 $\mu$ M              | NA                    | NA                              |
| Gln             | SLC38A2            | Km             | 2.3 mM       |             | Menchini and Chaudhry. Neuropharmacol. 2019                                    | NA                                     | 2300 $\mu$ M              | NA                    | NA                              |
| Cys2            | SLC7A11            | Km             | 0.05 mM      |             | Thomas et al. PLOS ONE 2015                                                    | NA                                     | 50 $\mu$ M                | NA                    | NA                              |
| Glu             | SLC7A11            | Km             | 7.5 mM       |             | Thomas et al. PLOS ONE 2015                                                    | NA                                     | 7500 $\mu$ M              | NA                    | Export Km for intracellular Glu |

Appendix Table S4 - Flux Ranges

| Process                                   | Value | Unit                       | Ref                                           | Assumption made to convert unit                                                                          | Converted quantity | Converted unit | Note                                                                             |
|-------------------------------------------|-------|----------------------------|-----------------------------------------------|----------------------------------------------------------------------------------------------------------|--------------------|----------------|----------------------------------------------------------------------------------|
| Cys2 uptake                               | 0.2   | nmol / mg protein / min    | Thomas et al. PLOS ONE 2015, Fig. 6           | Cellular protein concentration 300 mg / mL                                                               | 60                 | uM / min       | Lower measurement                                                                |
| Cys2 uptake                               | 0.8   | nmol / mg protein / min    | Thomas et al. PLOS ONE 2015, Fig. 6           | Cellular protein concentration 300 mg / mL                                                               | 240                | uM / min       | Higher measurement                                                               |
| Cys2 uptake                               | 0.6   | nmol / mg protein / min    | Ye et al. J. Neurosci. 1999, Fig. 5D          | Cellular protein concentration 300 mg / mL                                                               | 180                | uM / min       | NA                                                                               |
| Cys2 uptake                               | 7     | fmol / cell / hr           | Hostos et al. Dev. Cell 2016, Fig. 1          | Cell volume 3 pL                                                                                         | 40                 | uM / min       | NA                                                                               |
| Gln uptake                                | 3.5   | pmol / ug protein / min    | Parker et al. Metab. Eng. 2017, Fig. 2        | Cellular protein concentration 300 ug / uL                                                               | 1000               | uM / min       | NA                                                                               |
| Gln uptake                                | 100   | fmol / cell / hr           | Hostos et al. Dev. Cell 2016, Fig. 1          | Cell volume 3 pL                                                                                         | 1700               | uM / min       | NA                                                                               |
| Gln uptake                                | 300   | fmol / cell / hr           | Jain et al. Science 2012, Database S1         | Cell volume 3 pL                                                                                         | 5000               | uM / min       | Max from 60 cell lines                                                           |
| Gln uptake                                | 70    | fmol / cell / hr           | Jain et al. Science 2012, Database S1         | Cell volume 3 pL                                                                                         | 1200               | uM / min       | Median from 60 cell lines                                                        |
| Gln uptake                                | 10    | fmol / cell / hr           | Jain et al. Science 2012, Database S1         | Cell volume 3 pL                                                                                         | 170                | uM / min       | Min from 60 cell lines                                                           |
| Glu export                                | 2     | pmol / ug protein / min    | Parker et al. Metab. Eng. 2017, Fig. 2        | Cellular protein concentration 300 ug / uL                                                               | 600                | uM / min       | NA                                                                               |
| Glu export                                | 20    | fmol / cell / hr           | Hostos et al. Dev. Cell 2016, Fig. 1          | Cell volume 3 pL                                                                                         | 100                | uM / min       | NA                                                                               |
| Glu export                                | 100   | fmol / cell / hr           | Jain et al. Science 2012, Database S1         | Cell volume 3 pL                                                                                         | 500                | uM / min       | Max from 60 cell lines                                                           |
| Glu export                                | 10    | fmol / cell / hr           | Jain et al. Science 2012, Database S1         | Cell volume 3 pL                                                                                         | 50                 | uM / min       | Median from 60 cell lines                                                        |
| Glu export                                | -3    | fmol / cell / hr           | Jain et al. Science 2012, Database S1         | Cell volume 3 pL                                                                                         | -15                | uM / min       | Min from 60 cell lines;                                                          |
| Glu anaplerosis                           | 1     | pmol / ug protein / min    | Parker et al. Metab. Eng. 2017, Fig. 2        | Cellular protein concentration 300 ug / uL                                                               | 300                | uM / min       | Net uptake instead of export                                                     |
| Glu to other metabolites                  | 0.5   | pmol / ug protein / min    | Parker et al. Metab. Eng. 2017, Fig. 2        | Cellular protein concentration 300 ug / uL                                                               | 150                | uM / min       | Flux unaccounted for in the diagram                                              |
| Gln to other metabolites / total labeling | 0.1   | NA                         | Hostos et al. Dev. Cell 2016, Fig. 1          | Gln uptake flux 1700 uM / min (Hostos et al. Dev. Cell 2016)                                             | 170                | uM / min       | Gln channeled to soluble, polar fraction (metabolites)                           |
| Glc uptake                                | 900   | fmol / cell / hr           | Jain et al. Science 2012, Database S1         | Cell volume 3 pL                                                                                         | 15000              | uM / min       | Max from 60 cell lines                                                           |
| Glc uptake                                | 300   | fmol / cell / hr           | Jain et al. Science 2012, Database S1         | Cell volume 3 pL                                                                                         | 5000               | uM / min       | Median from 60 cell lines                                                        |
| Glc uptake                                | 40    | fmol / cell / hr           | Jain et al. Science 2012, Database S1         | Cell volume 3 pL                                                                                         | 700                | uM / min       | Min from 60 cell lines                                                           |
| Glc uptake                                | 300   | fmol / cell / hr           | Hostos et al. Dev. Cell 2016, Fig. 1          | Cell volume 3 pL                                                                                         | 5000               | uM / min       | NA                                                                               |
| Glc uptake                                | 40    | pmol / ug protein / min    | Parker et al. Metab. Eng. 2017, Fig. 2        | Cellular protein concentration 300 ug / uL                                                               | 12000              | uM / min       | NA                                                                               |
| Glc uptake                                | 0.5   | umol / uL packed cell / hr | Tanner et al. Cell Syst. 2018, Fig. 1         | 70 ug / uL packed cells (Fan et al. Nature 2014, Fig. S9);<br>Cellular protein concentration 300 ug / uL | 36000              | uM / min       | Basal rate                                                                       |
| Glc uptake                                | 1     | umol / uL packed cell / hr | Tanner et al. Cell Syst. 2018, Fig. 1         | 70 ug / uL packed cells (Fan et al. Nature 2014, Fig. S9);<br>Cellular protein concentration 300 ug / uL | 72000              | uM / min       | Ras-stimulated rate                                                              |
| Glc uptake                                | 1.25  | pmol / cell / hr           | Liu et al. Nat. Cell Biol. 2020, Fig. S1      | Cell volume 3 pL                                                                                         | 7000               | uM / min       | NA                                                                               |
| NADPH synthesis by NADK                   | 12    | pmol / 10*6 cell / hr      | Liu et al. Cell Metab. 2018, Fig. 1 (in text) | Cell volume 3 pL                                                                                         | 0.07               | uM / min       | Very slow compared to regeneration;<br>Assume to be total NADPH/+ to be constant |
| OXPPP flux                                | 2     | nmol / uL packed cell / hr | Fan et al. Nature 2014, Fig. 1                | 70 ug / uL packed cells (Fan et al. Nature 2014, Fig. S9);<br>Cellular protein concentration 300 ug / uL | 150                | uM / min       | NA                                                                               |
| OXPPP flux / glycolysis flux              | 0.04  | NA                         | Liu et al. Nat. Cell Biol. 2020, Fig. 1d      | Glc uptake flux 7000 uM / min (Liu et al. Nat. Cell Biol. 2020)                                          | 280                | uM / min       | NA                                                                               |
| OXPPP flux / glycolysis flux              | 0.02  | NA                         | Bionumbers #112684                            | NA                                                                                                       | NA                 | NA             | NA                                                                               |
| NADPH regeneration by OXPPP               | 2     | NADPH / Glc                | Generic; 1 from G6PD, 1 from PGD              | NA                                                                                                       | NA                 | NA             | NA                                                                               |
| NADPH regeneration total                  | 10    | nmol / uL packed cell / hr | Fan et al. Nature 2014, Fig. 1                | 70 ug / uL packed cells (Fan et al. Nature 2014, Fig. S9);<br>Cellular protein concentration 300 ug / uL | 720                | uM / min       | NA                                                                               |
| Fraction NADPH consumed by anabolism      | 0.9   | NA                         | Fan et al. Nature 2014, Fig. 4                | NA                                                                                                       | NA                 | NA             | Upper bound                                                                      |
| Fraction NADPH consumed by anabolism      | 0.7   | NA                         | Fan et al. Nature 2014, Fig. 4                | NA                                                                                                       | NA                 | NA             | Lower bound                                                                      |

Appendix Table S5 - Fluxes Used To Estimate Parameters

| Process                              | Flux value used | Flux unit | Model                                                                                                                                                 | Note                                                                                                                                             | Interpretation             | Parameter estimated                             | Parameter unit |
|--------------------------------------|-----------------|-----------|-------------------------------------------------------------------------------------------------------------------------------------------------------|--------------------------------------------------------------------------------------------------------------------------------------------------|----------------------------|-------------------------------------------------|----------------|
| NADPH regeneration by Glc metabolism | 500             | uM/min    | $k_{\text{NadphRedGlc}} \cdot \text{glc} / ((k_{\text{glcIn}} + \text{glc}) \cdot (\text{nadplot} - \text{nadph}) \cdot (1 + \text{switchNadphRed}))$ | Assume total flux = 1000 uM/min;<br>Assume switchNadphRed = 0 for estimation process                                                             | Not added to Glc for NADPH | $k_{\text{NadphRedGlc}}$                        | /min           |
| NADPH regeneration by Glu metabolism | 500             | uM/min    | $k_{\text{NadphRedGlu}} \cdot \text{glu} \cdot (\text{nadplot} - \text{nadph}) \cdot (1 - \text{switchNadphRed})$                                     | Assume total flux = 1000 uM/min;<br>Assume switchNadphRed = 0 for estimation process                                                             | Not added to Glc for NADPH | $k_{\text{NadphRedGlu}}$                        | /min           |
| Cys2 uptake                          | 30              | uM/min    | $k_{\text{Cys2Im}} \cdot \text{cys2o} / (k_{\text{Cys2In}} + \text{cys2o}) \cdot \text{xt} \cdot \text{glu}$                                          | Assume $\text{xt} = 0.1$ uM;<br>Assume Cys2 uptake flux = 30 uM/min;<br>Both lower estimates;<br>Assume 1:1 exchange;<br>Same as Glu export flux | Not added to Cys2 for Cys  | $k_{\text{Cys2Im}}$ ; $k_{\text{GluEx}}$        | /uM/min        |
| Glu export                           | 30              | uM/min    | $k_{\text{GluEx}} \cdot \text{cys2o} / (k_{\text{Cys2In}} + \text{cys2o}) \cdot \text{xt} \cdot \text{glu}$                                           | Assume $\text{xt} = 0.1$ uM;<br>Assume Glu export flux = 30 uM/min;<br>Both lower estimates;<br>Assume 1:1 exchange;<br>Same as Glu export flux  | Not added to Cys2 for Cys  | $k_{\text{GluEx}}$ ; $k_{\text{Cys2Im}}$        | /uM/min        |
| Cys2 reduction by NADPH              | 30              | uM/min    | $k_{\text{Cys2Red}} \cdot \text{cys2} \cdot \text{nadph}$                                                                                             | Assume all uptaken Cys2 gets reduced to Cys;<br>Assume NADPH provides all reducing power needed;<br>Same as NADPH consumed by Cys2               |                            | $k_{\text{Cys2Red}}$ ; $k_{\text{NadphOxCys2}}$ | /uM/min        |
| NADPH consumed by Cys2               | 30              | uM/min    | $k_{\text{NadphOxCys2}} \cdot \text{cys2} \cdot \text{nadph}$                                                                                         | Assume all uptaken Cys2 gets reduced to Cys;<br>Assume NADPH provides all reducing power needed;                                                 |                            |                                                 |                |
| NADPH consumed by anabolism          | 800             | uM/min    | $k_{\text{NadphOxAnab}} \cdot \text{nadph}$                                                                                                           | Same as Cys2 reduction by NADPH<br>Assume anabolism consumes 80% NADPH                                                                           |                            | $k_{\text{NadphOxCys2}}$ ; $k_{\text{Cys2Red}}$ | /uM/min        |
| Gln uptake and Glu production        | 300             | uM/min    | $k_{\text{GluPro}} \cdot \text{glu} / (k_{\text{glnIn}} + \text{glu})$                                                                                | Assume all Gln uptaken hydrolyzed to Glu;<br>Assume Gln uptake = 300 uM/min;<br>A lower estimate                                                 | Not added to Gln           | $k_{\text{GluPro}}$                             | uM/min         |
| GSH synthesis                        | 30              | uM/min    | $k_{\text{GshPro}} \cdot \text{cys} \cdot \text{glu}$                                                                                                 | Assume 10% of Glu produced goes to GSH;<br>An upper bound estimate                                                                               |                            | $k_{\text{GshPro}}$                             | /uM/min        |



**Appendix Table S6 - Variable Steady States to Estimate Parameters**

| <b>Molecule</b>               | <b>State</b>    | <b>Value</b> | <b>Unit</b> | <b>Note</b>                                       |
|-------------------------------|-----------------|--------------|-------------|---------------------------------------------------|
| ROS                           | Full nutrient   | 0.01         | uM          |                                                   |
| GSH                           | Full nutrient   | 1000         | uM          |                                                   |
| GSSG                          | Full nutrient   | 100          | uM          |                                                   |
| NADPH                         | Full nutrient   | 1            | uM          |                                                   |
| Cys2                          | Full nutrient   | 1            | uM          | Lower estimate;Consistent with lower SLC7A11 used |
| Cys                           | Full nutrient   | 100          | uM          | Lower estimate;Consistent with lower SLC7A11 used |
| Glu                           | Full nutrient   | 10000        | uM          |                                                   |
| Ca2+                          | Full nutrient   | 0.1          | uM          |                                                   |
| RTK-phospho / RTK-total       | Full nutrient   | 0.1          | NA          | Ref. Graham et al. Mol. Syst. Biol. 2012          |
| RTK-phospho / RTK-total       | Glc deprivation | 1            | NA          | Ref. Graham et al. Mol. Syst. Biol. 2012          |
| PPTase-reduced / PPTase-total | Full nutrient   | 1            | NA          | Ref. Graham et al. Mol. Syst. Biol. 2012          |
| PPTase-reduced / PPTase-total | Glc deprivation | 0.5          | NA          | Ref. Graham et al. Mol. Syst. Biol. 2012          |

**Appendix Table S7 - Predetermined or Arbitrary Parameters**

| <b>Parameter</b> | <b>Type</b>       | <b>Value</b> | <b>Range</b> | <b>Unit</b> | <b>Note</b>                         |
|------------------|-------------------|--------------|--------------|-------------|-------------------------------------|
| xct              | Constant          | 0.1          | 0 to 10      | uM          | Model low SLC7A11 cell              |
| n1               | Hill exponent     | 5            | 1 to n       | NA          | Ultrasensitivity in auto-inhibition |
| fRosGlc          | Artificial handle | 0.1          | 0 to 1       | NA          | Arbitrary                           |
| fRosGlu          | Artificial handle | 0.4          | 0 to 1       | NA          | Arbitrary                           |
| switchNadphRed   | Artificial handle | 0            | -1 to 1      | NA          | Model non-addicted cell             |
| foldRos          | Artificial handle | 1            | 0 to n       | NA          | Base line                           |

| Appendix Table S8 - Estimate Parameter Values | Flux value used                         | Flux unit | Model                    | Known parameters and estimated steady state Parameter estimated                                                                                                                                                                                                                                                              | Estimated value                        | Parameter unit                     |
|-----------------------------------------------|-----------------------------------------|-----------|--------------------------|------------------------------------------------------------------------------------------------------------------------------------------------------------------------------------------------------------------------------------------------------------------------------------------------------------------------------|----------------------------------------|------------------------------------|
| Estimation step                               | Process                                 |           |                          |                                                                                                                                                                                                                                                                                                                              |                                        |                                    |
| 1                                             | NADPH regeneration by Glc metabolism    | 500       | $\mu\text{M}/\text{min}$ | $k\text{NadphRedGlc} \cdot \text{glc} / (\text{KglcIn} + \text{glc}) \cdot (\text{nadpIn} - \text{nadph}) \cdot (1 + \text{switchNadphRed})$                                                                                                                                                                                 | $k\text{NadphRedGlc}$                  | 5750 / $\mu\text{M}/\text{min}$    |
|                                               |                                         |           |                          | $\text{glc} = 10000 \text{ }\mu\text{M};$<br>$\text{KglcIn} = 1500 \text{ }\mu\text{M};$<br>$\text{nadpIn} = 1 \text{ }\mu\text{M};$<br>$\text{nadp} = 0.1 \text{ }\mu\text{M};$<br>$\text{switchNadphRed} = 0;$                                                                                                             |                                        |                                    |
| 2                                             | NADPH regeneration by Glu metabolism    | 500       | $\mu\text{M}/\text{min}$ | $k\text{NadphRedGlu} \cdot \text{glu} \cdot (\text{nadpIn} - \text{nadph}) \cdot (1 - \text{switchNadphRed})$                                                                                                                                                                                                                | $k\text{NadphRedGlu}$                  | 0.5 / $\mu\text{M}/\text{min}$     |
| 3                                             | NADPH consumed by anabolism             | 800       | $\mu\text{M}/\text{min}$ | $k\text{NadphOxAnab} \cdot \text{nadph}$                                                                                                                                                                                                                                                                                     | $k\text{NadphOxAnab}$                  | 800 / $\mu\text{M}/\text{min}$     |
|                                               |                                         |           |                          | $\text{glu} = 10000 \text{ }\mu\text{M};$<br>$\text{nadpIn} = 1 \text{ }\mu\text{M};$<br>$\text{nadph} = 0.9 \text{ }\mu\text{M};$<br>$\text{switchNadphRed} = 0;$<br>$\text{nadp} = 1 \text{ }\mu\text{M};$                                                                                                                 |                                        |                                    |
| 4                                             | Cys2 uptake                             | 30        | $\mu\text{M}/\text{min}$ | $k\text{Cys2In} \cdot \text{cys2o} / (\text{Kcys2In} + \text{cys2o}) \cdot \text{xt} \cdot \text{glu}$                                                                                                                                                                                                                       | $k\text{Cys2In}; k\text{GluEx}$        | 0.0375 / $\mu\text{M}/\text{min}$  |
|                                               |                                         |           |                          | $\text{cys2o} = 0.2 \text{ }\mu\text{M};$<br>$\text{Kcys2In} = 0.05 \text{ }\mu\text{M};$<br>$\text{xt} = 0.1 \text{ }\mu\text{M};$<br>$\text{glu} = 10000 \text{ }\mu\text{M};$                                                                                                                                             |                                        |                                    |
| 4                                             | Glu export                              | 30        | $\mu\text{M}/\text{min}$ | $k\text{GluEx} \cdot \text{cys2o} / (\text{Kcys2In} + \text{cys2o}) \cdot \text{xt} \cdot \text{glu}$                                                                                                                                                                                                                        | $k\text{GluEx}; k\text{Cys2In}$        | 0.0375 / $\mu\text{M}/\text{min}$  |
|                                               |                                         |           |                          | $\text{cys2o} = 0.2 \text{ }\mu\text{M};$<br>$\text{Kcys2In} = 0.05 \text{ }\mu\text{M};$<br>$\text{xt} = 0.1 \text{ }\mu\text{M};$<br>$\text{glu} = 10000 \text{ }\mu\text{M};$                                                                                                                                             |                                        |                                    |
| 5                                             | Cys2 reduction by NADPH                 | 30        | $\mu\text{M}/\text{min}$ | $k\text{Cys2Red} \cdot \text{cys2} \cdot \text{nadph}$                                                                                                                                                                                                                                                                       | $k\text{Cys2Red}; k\text{NadphOxCys2}$ | 30 / $\mu\text{M}/\text{min}$      |
|                                               |                                         |           |                          | $\text{cys2} = 1 \text{ }\mu\text{M};$<br>$\text{nadph} = 1 \text{ }\mu\text{M};$                                                                                                                                                                                                                                            |                                        |                                    |
| 5                                             | NADPH consumed by Cys2                  | 30        | $\mu\text{M}/\text{min}$ | $k\text{NadphOxCys2} \cdot \text{cys2} \cdot \text{nadph}$                                                                                                                                                                                                                                                                   | $k\text{NadphOxCys2}; k\text{Cys2Red}$ | 30 / $\mu\text{M}/\text{min}$      |
|                                               |                                         |           |                          | $\text{cys2} = 1 \text{ }\mu\text{M};$<br>$\text{nadph} = 1 \text{ }\mu\text{M};$                                                                                                                                                                                                                                            |                                        |                                    |
| 5                                             | Cys production from Cys2 and NADPH      | 60        | $\mu\text{M}/\text{min}$ | $2 \cdot k\text{NadphOxCys2} \cdot \text{cys2} \cdot \text{nadph}$                                                                                                                                                                                                                                                           | $k\text{NadphOxCys2}; k\text{Cys2Red}$ | 30 / $\mu\text{M}/\text{min}$      |
|                                               |                                         |           |                          | $\text{cys2} = 1 \text{ }\mu\text{M};$<br>$\text{nadph} = 1 \text{ }\mu\text{M};$                                                                                                                                                                                                                                            |                                        |                                    |
| 6                                             | NADPH consumed by GSSG                  | 170       | $\mu\text{M}/\text{min}$ | $k\text{NadphOxGssg} \cdot \text{gssg} \cdot \text{nadph}$                                                                                                                                                                                                                                                                   | $k\text{NadphOxGssg}$                  | 1.7 / $\mu\text{M}/\text{min}$     |
|                                               |                                         |           |                          | $\text{gssg} = 100 \text{ }\mu\text{M};$<br>$\text{nadph} = 1 \text{ }\mu\text{M};$                                                                                                                                                                                                                                          |                                        |                                    |
| 6                                             | GSSG reduced by NADPH                   | 170       | $\mu\text{M}/\text{min}$ | $k\text{GshRed} \cdot \text{nadph} \cdot \text{gssg}$                                                                                                                                                                                                                                                                        | $k\text{GshRed}$                       | 1.7 / $\mu\text{M}/\text{min}$     |
|                                               |                                         |           |                          | $\text{gssg} = 100 \text{ }\mu\text{M};$<br>$\text{nadph} = 1 \text{ }\mu\text{M};$                                                                                                                                                                                                                                          |                                        |                                    |
| 6                                             | GSH regenerated by NADPH                | 340       | $\mu\text{M}/\text{min}$ | $2 \cdot k\text{GshRed} \cdot \text{nadph} \cdot \text{gssg}$                                                                                                                                                                                                                                                                | $k\text{GshRed}$                       | 1.7 / $\mu\text{M}/\text{min}$     |
|                                               |                                         |           |                          | $\text{gssg} = 100 \text{ }\mu\text{M};$<br>$\text{nadph} = 1 \text{ }\mu\text{M};$                                                                                                                                                                                                                                          |                                        |                                    |
| 7                                             | Gln uptake and Glu production           | 300       | $\mu\text{M}/\text{min}$ | $k\text{GluPro} \cdot \text{gln} / (\text{KglIn} + \text{gln})$                                                                                                                                                                                                                                                              | $k\text{GluPro}$                       | 315 / $\mu\text{M}/\text{min}$     |
|                                               |                                         |           |                          | $\text{gln} = 2000 \text{ }\mu\text{M};$<br>$\text{KglIn} = 100 \text{ }\mu\text{M};$                                                                                                                                                                                                                                        |                                        |                                    |
| 8                                             | GSH synthesis                           | 30        | $\mu\text{M}/\text{min}$ | $k\text{GshPro} \cdot \text{cys} \cdot \text{glu}$                                                                                                                                                                                                                                                                           | $k\text{GshPro}$                       | 0.00005 / $\mu\text{M}/\text{min}$ |
|                                               |                                         |           |                          | $\text{glu} = 10000 \text{ }\mu\text{M};$<br>$\text{cys} = 100 \text{ }\mu\text{M};$                                                                                                                                                                                                                                         |                                        |                                    |
| 9                                             | Cys degradation through other processes | 30        | $\mu\text{M}/\text{min}$ | $k\text{CysDeg} \cdot \text{cys}$                                                                                                                                                                                                                                                                                            | $k\text{CysDeg}$                       | 0.3 / $\text{min}$                 |
|                                               |                                         |           |                          | $\text{cys} = 100 \text{ }\mu\text{M};$                                                                                                                                                                                                                                                                                      |                                        |                                    |
| 10                                            | Glu degradation through other processes | 240       | $\mu\text{M}/\text{min}$ | $k\text{GluDeg} \cdot \text{glu}$                                                                                                                                                                                                                                                                                            | $k\text{GluDeg}$                       | 0.024 / $\text{min}$               |
|                                               |                                         |           |                          | $\text{glu} = 10000 \text{ }\mu\text{M};$                                                                                                                                                                                                                                                                                    |                                        |                                    |
| 11                                            | GSH and GSSG degradation                | 30        | $\mu\text{M}/\text{min}$ | $k\text{GshDeg} \cdot \text{gsh} + k\text{GssgDeg} \cdot \text{gssg}$                                                                                                                                                                                                                                                        | $k\text{GshDeg}; k\text{GssgDeg}$      | 0.027 / $\text{min}$               |
|                                               |                                         |           |                          | $\text{ros} = 0.01 \text{ }\mu\text{M};$<br>$\text{gsh} = 1000 \text{ }\mu\text{M};$<br>$\text{gssg} = 100 \text{ }\mu\text{M};$                                                                                                                                                                                             |                                        |                                    |
| 12                                            | GSH oxidation by ROS                    | 340       | $\mu\text{M}/\text{min}$ | $2 \cdot k\text{GshOx} \cdot \text{ros} \cdot \text{gsh}^2$                                                                                                                                                                                                                                                                  | $k\text{GshOx}; k\text{RosDeg}$        | 0.017 / $\mu\text{M}/\text{min}$   |
|                                               |                                         |           |                          | $\text{ros} = 0.01 \text{ }\mu\text{M};$<br>$\text{gsh} = 1000 \text{ }\mu\text{M};$                                                                                                                                                                                                                                         |                                        |                                    |
| 12                                            | GSSG production from GSH oxidation      | 170       | $\mu\text{M}/\text{min}$ | $k\text{GshOx} \cdot \text{ros} \cdot \text{gsh}^2$                                                                                                                                                                                                                                                                          | $k\text{GshOx}; k\text{RosDeg}$        | 0.017 / $\mu\text{M}/\text{min}$   |
|                                               |                                         |           |                          | $\text{ros} = 0.01 \text{ }\mu\text{M};$<br>$\text{gsh} = 1000 \text{ }\mu\text{M};$                                                                                                                                                                                                                                         |                                        |                                    |
| 12                                            | ROS removed by GSH                      | 170       | $\mu\text{M}/\text{min}$ | $k\text{RosDeg} \cdot \text{ros} \cdot \text{gsh}^2$                                                                                                                                                                                                                                                                         | $k\text{RosDeg}$                       | 0.017 / $\mu\text{M}/\text{min}$   |
|                                               |                                         |           |                          | $\text{ros} = 0.01 \text{ }\mu\text{M};$<br>$\text{gsh} = 1000 \text{ }\mu\text{M};$                                                                                                                                                                                                                                         |                                        |                                    |
| 13                                            | ROS produced by lipid metabolism        | 170       | $\mu\text{M}/\text{min}$ | $\text{foldRos} \cdot k\text{RosProBase} \cdot (1 - \text{fRosGlc} - \text{fRosGlu}) \cdot \text{ca} \cdot \text{rtkPhos} \cdot k\text{RosInhRos}^{\text{n1}} / (k\text{RosInhRos}^{\text{n1}} + \text{ros}^{\text{n1}})$                                                                                                    | $k\text{RosProBase}$                   | 170000 / $\mu\text{M}/\text{min}$  |
|                                               |                                         |           |                          | $\text{foldRos} = 1;$<br>$\text{fRosGlc} = 0;$<br>$\text{fRosGlu} = 0;$<br>$\text{glc} = 10000 \text{ }\mu\text{M};$<br>$\text{KglcIn} = 1500 \text{ }\mu\text{M};$<br>$\text{ca} = 0.1 \text{ }\mu\text{M};$<br>$\text{rtkPhos} = 0.01 \text{ }\mu\text{M};$<br>$k\text{RosInhRos} = 0.5;$<br>$\text{ros}^{\text{n1}} = 5;$ |                                        |                                    |
| 14                                            | ROS produced by Glc metabolism          | 170       | $\mu\text{M}/\text{min}$ | $\text{foldRos} \cdot k\text{RosProGlc} \cdot \text{glc} / (\text{KglcIn} + \text{glc}) \cdot \text{fRosGlc} \cdot \text{ca} \cdot \text{rtkPhos} \cdot k\text{RosInhRos}^{\text{n1}} / (k\text{RosInhRos}^{\text{n1}} + \text{ros}^{\text{n1}})$                                                                            | $k\text{RosProGlc}$                    | 195500 / $\mu\text{M}/\text{min}$  |
|                                               |                                         |           |                          | $\text{foldRos} = 1;$<br>$\text{fRosGlc} = 1;$<br>$\text{fRosGlu} = 0;$<br>$\text{glc} = 10000 \text{ }\mu\text{M};$<br>$\text{KglcIn} = 1500 \text{ }\mu\text{M};$<br>$\text{ca} = 0.1 \text{ }\mu\text{M};$<br>$\text{rtkPhos} = 0.01 \text{ }\mu\text{M};$<br>$k\text{RosInhRos} = 0.5;$<br>$\text{ros}^{\text{n1}} = 5;$ |                                        |                                    |
| 15                                            | ROS produced by Glu metabolism          | 170       | $\mu\text{M}/\text{min}$ | $\text{foldRos} \cdot k\text{RosProGlu} \cdot \text{glu} \cdot \text{fRosGlu} \cdot \text{ca} \cdot \text{rtkPhos} \cdot k\text{RosInhRos}^{\text{n1}} / (k\text{RosInhRos}^{\text{n1}} + \text{ros}^{\text{n1}})$                                                                                                           | $k\text{RosProGlu}$                    | 17 / $\mu\text{M}^2 / \text{min}$  |
|                                               |                                         |           |                          | $\text{foldRos} = 1;$<br>$\text{fRosGlc} = 0;$<br>$\text{fRosGlu} = 1;$<br>$\text{glu} = 10000 \text{ }\mu\text{M};$<br>$\text{ca} = 0.1 \text{ }\mu\text{M};$<br>$\text{rtkPhos} = 0.01 \text{ }\mu\text{M};$<br>$k\text{RosInhRos} = 0.5;$<br>$\text{ros}^{\text{n1}} = 5;$                                                |                                        |                                    |

Appendix Table S9 - Parameter Summary

| Parameter      | Type              | Process                            | Interpretation                                                                                                    | Note                 | Value   |
|----------------|-------------------|------------------------------------|-------------------------------------------------------------------------------------------------------------------|----------------------|---------|
| kRosDeg        | Rate constant     | ROS removal; GSH oxidation         | ROS removal by GSH                                                                                                | Same as kGshOx       | 0.017   |
| kGshOx         | Rate constant     | ROS removal; GSH oxidation         | GSH consumed by ROS                                                                                               | Same as kRosDeg      | 0.017   |
| kGshRed        | Rate constant     | GSH regeneration; NADPH oxidation  | GSH regenerated by NADPH                                                                                          | Same as kNadphOxGssg | 1.7     |
| kNadphOxAnab   | Rate constant     | Anabolism; NADPH oxidation         | NADPH consumed in anabolism                                                                                       |                      | 800     |
| kNadphOxGssg   | Rate constant     | GSH regeneration; NADPH oxidation  | NADPH consumed by GSSG                                                                                            | Same as kGshRed      | 1.7     |
| kNadphOxCys2   | Rate constant     | Cys production; NADPH oxidation    | NADPH consumed by Cys2                                                                                            | Same as kCys2Red     | 30      |
| kCys2Red       | Rate constant     | Cys production; NADPH oxidation    | Cys2 reduced by NADPH                                                                                             | Same as kNadphOxCys2 | 30      |
| kPptaseRedGsh  | Rate constant     | RTK signaling                      | PPTase reduced by GSH                                                                                             |                      | 0.1     |
| kPptaseOxRos   | Rate constant     | RTK signaling                      | PPTase oxidized by ROS                                                                                            |                      | 10      |
| kRtkPhos       | Rate constant     | RTK signaling                      | RTK got phosphorylated                                                                                            |                      | 0.1     |
| kRtkDephos     | Rate constant     | RTK signaling                      | RTK dephosphorylated by PPTase                                                                                    |                      | 10      |
| kRosProBase    | Rate constant     | ROS production                     | Basal ROS production; ROS production by lipid metabolism; ROS production not (instantly) responsive to Glc or Glu |                      | 170000  |
| kRosProGlc     | Rate constant     | ROS production                     | ROS production by Glc metabolism; ROS production responsive to Glc                                                |                      | 195500  |
| kRosProGlu     | Rate constant     | ROS production                     | ROS production by Glu metabolism; ROS production responsive to Glu                                                |                      | 17      |
| kNadpRedGlc    | Rate constant     | NADPH regeneration                 | NADPH regenerated by Glc metabolism; NADPH regenerated by OXPPP                                                   |                      | 5750    |
| kNadpRedGlu    | Rate constant     | NADPH regeneration                 | NADPH regenerated by Glu metabolism; NADPH regenerated by IDH1 and ME1                                            |                      | 0.5     |
| kGluPro        | Rate constant     | Gln uptake; Glu production         | Gln uptake; Glu production from Gln                                                                               |                      | 315     |
| kGluDeg        | Rate constant     | Glu metabolism                     | Glu consumed in other processes                                                                                   |                      | 0.024   |
| kGluEx         | Rate constant     | Glu export; Cys2 uptake            | Glu exported in exchange of Cys2                                                                                  | Same as kCys2Im      | 0.0375  |
| kGshPro        | Rate constant     | GSH synthesis                      | GSH de novo synthesis                                                                                             |                      | 0.00005 |
| kGshDeg        | Rate constant     | GSH degradation                    | GSH exported; GSH export                                                                                          |                      | 0.027   |
| kGssgDeg       | Rate constant     | GSSG degradation                   | GSSG degradation; GSSG export                                                                                     |                      | 0.027   |
| kCysDeg        | Rate constant     | Cys metabolism                     | Cys consumed in other processes                                                                                   |                      | 0.3     |
| kCalmBase      | Rate constant     | Ca2+ influx                        | Basal Ca2+ influx                                                                                                 |                      | 0.1     |
| kCalmRos       | Rate constant     | Ca2+ influx                        | ROS-induced Ca2+ release                                                                                          |                      | 1       |
| kCaOut         | Rate constant     | Ca2+ efflux                        | Ca2+ efflux                                                                                                       |                      | 1       |
| kCys2Im        | Rate constant     | Glu export; Cys2 uptake            | Cys2 uptake at the expense of Glu                                                                                 | Same as kGluEx       | 0.0375  |
| xc             | Constant          | Glu export; Cys2 uptake            | SLC7A11 abundance; Mass conservation                                                                              |                      | 3       |
| nadpTot        | Mass conservation | NADPH regeneration                 | Total NADPH+; Mass conservation                                                                                   |                      | 1       |
| pptaseTot      | Mass conservation | RTK signaling                      | Total PPTase; Mass conservation                                                                                   |                      | 0.1     |
| rtkTot         | Mass conservation | RTK signaling                      | Total RTK; Mass conservation                                                                                      |                      | 0.1     |
| KrosInhRos     | Km                | ROS production                     | ROS auto-inhibition; Redox inhibition of OXPHOS / ETC enzymes; Oxidative damages to ETC / mitochondria            |                      | 0.5     |
| n1             | Hill exponent     | ROS production                     | Ultrasensitivity in ROS auto-inhibition                                                                           |                      | 5       |
| glc            | Constant          | ROS production; NADPH regeneration | Glc abundance in media                                                                                            |                      | 10000   |
| gln            | Constant          | ROS production; Glu production     | Gln abundance in media                                                                                            |                      | 2000    |
| cys2o          | Constant          | NADPH oxidation                    | Cys2 abundance in media                                                                                           |                      | 200     |
| KglnIn         | Km                | Gln uptake                         | Gln concentration of half max uptake rate                                                                         |                      | 100     |
| Kcys2In        | Km                | Cys2 uptake                        | Cys2 concentration of half max uptake rate                                                                        |                      | 50      |
| KglcIn         | Km                | Glc uptake                         | Glc concentration of half max uptake rate                                                                         |                      | 1500    |
| fRosGlc        | Artificial handle | ROS production                     | Fraction ROS production dependent on Glc metabolism                                                               |                      | 0.1     |
| fRosGlu        | Artificial handle | ROS production                     | Fraction ROS production dependent on Glu metabolism                                                               |                      | 0.4     |
| switchNadphRed | Artificial handle | NADPH regeneration                 | Fraction NADPH regeneration dependent on Glc metabolism                                                           |                      | 0.7     |
| foldRos        | Artificial handle | ROS production                     | Strength of ROS production                                                                                        |                      | 1       |
